# Supplementary material
Source: PubMed Central journal article supplement (PMC10273133)
Supplement: jamaophthalmol-e232289-s002.pdf [file jamaophthalmol-e232289-s002.pdf]

## Data Sharing Statement

Lundeen. Prevalence of Diabetic Retinopathy in the US in 2021. *JAMA Ophthalmol*. Published June 15, 2023. doi:10.1001/jamaophthalmol.2023.2289

### Data

**Data available:** No

### Additional Information

**Explanation for why data not available:** Some of the data used in this meta-regression are not publicly available (e.g. claims data from Medicare and Medicaid). We have access to these data through a contract with CMS.
